# Supplementary material for: A Genome-Wide Association Study Identifies Multiple Regions Associated with Head Size in Catfish
Source: Oxford University Press journal article supplement (doi:10.1534/g3.116.032201), 2016-08-25
Supplement: 032201_figures1.pdf [file 032201_figures1.pdf]

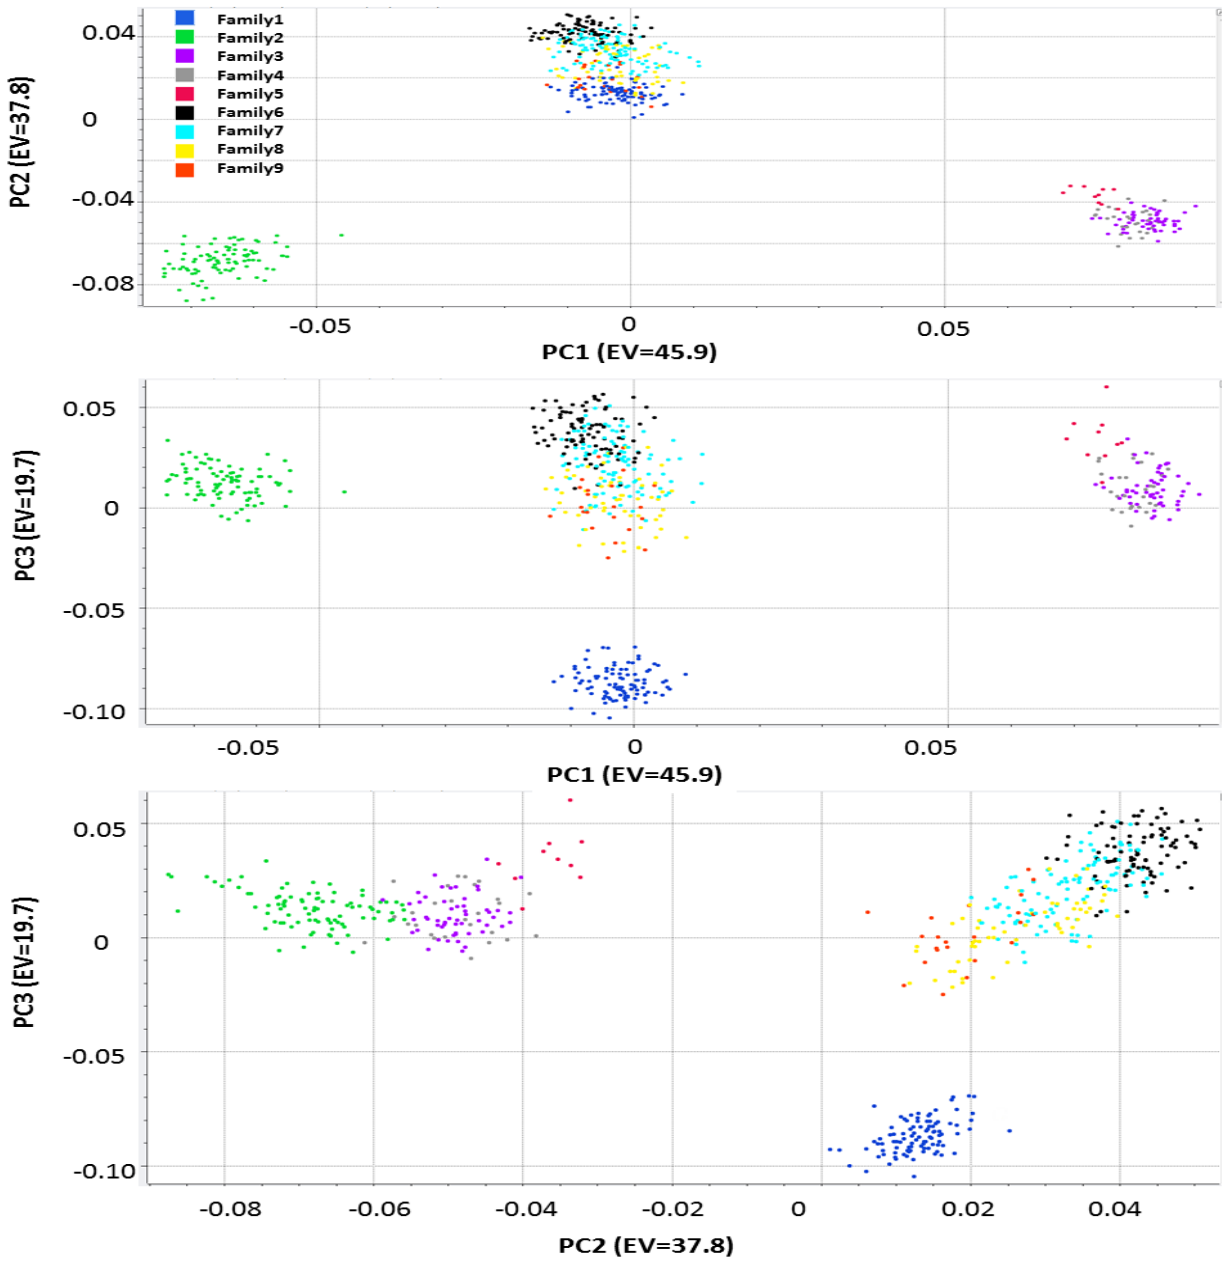

**Figure S1.**  
**Sample structure identified by PCA with the first three principal components using sample genotypes.**  
 EV: eigenvalue.
