# Supplementary material for: A Genome-Wide Association Study Identifies Multiple Regions Associated with Head Size in Catfish
Source: Oxford University Press journal article supplement (doi:10.1534/g3.116.032201), 2016-08-25
Supplement: 032201_figures4.pdf [file 032201_figures4.pdf]

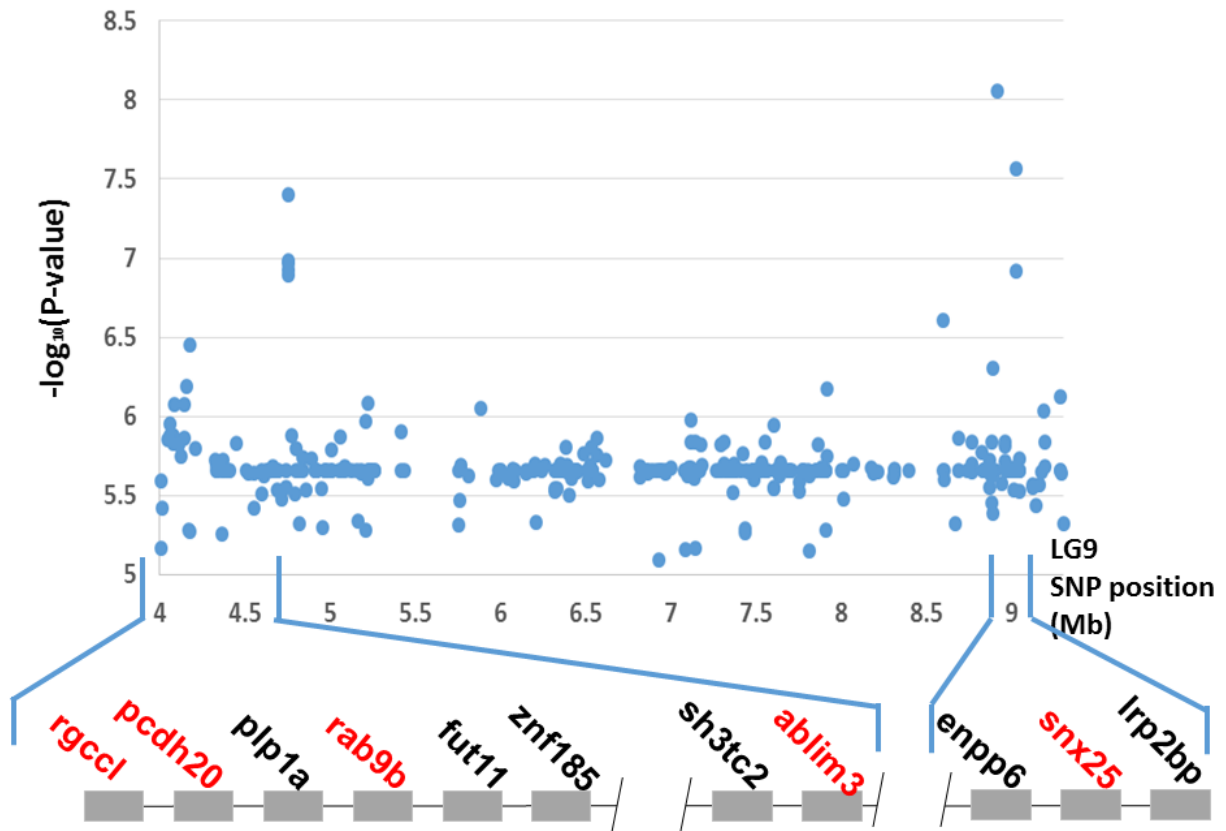

Figure S4. Regional genome scan for the QTL significantly associated with head width on LG9.
