# Supplementary material for: A Genome-Wide Association Study Identifies Multiple Regions Associated with Head Size in Catfish
Source: Oxford University Press journal article supplement (doi:10.1534/g3.116.032201), 2016-08-25
Supplement: 032201_figures5.pdf [file 032201_figures5.pdf]

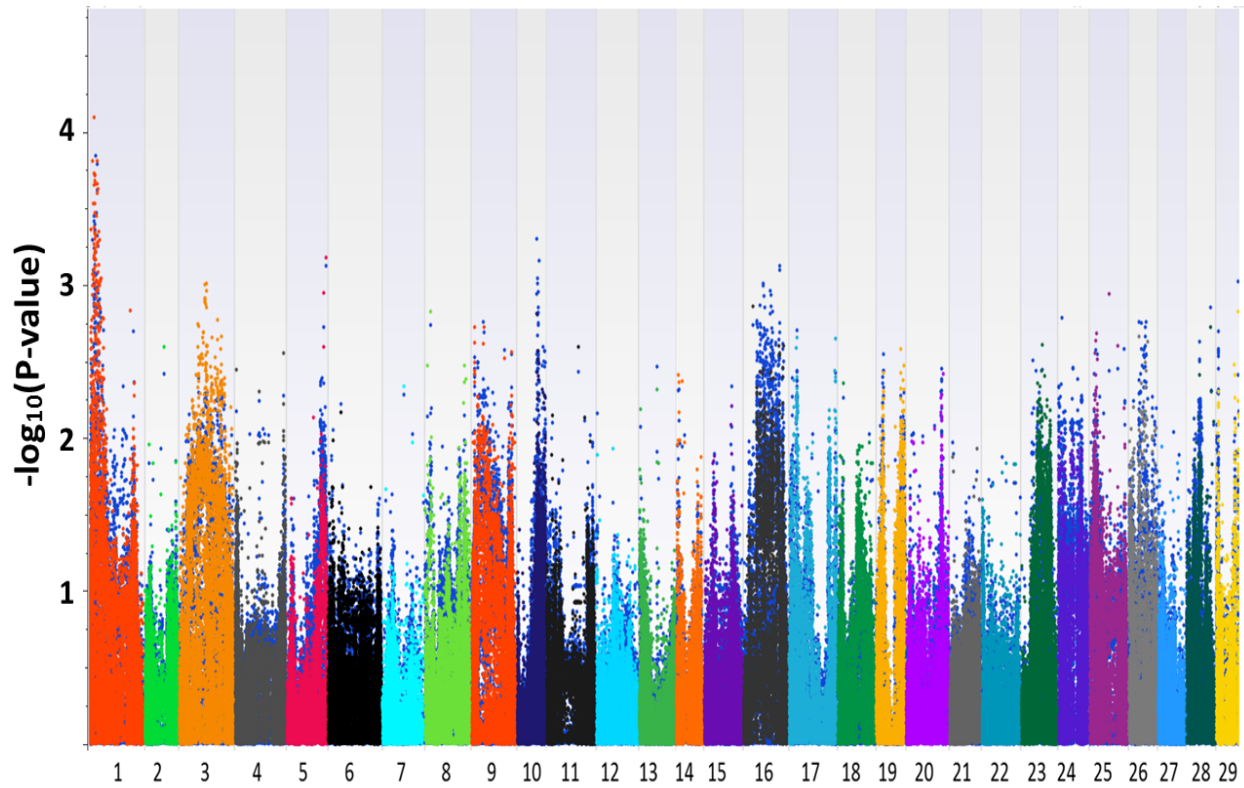

**Figure S5. Manhattan plots for head depth.** The plots in different colors in the front layer were generated from EMMAX and the plots in blue in the back layer were generated from QFAM.
