# Supplementary material for: A Genome-Wide Association Study Identifies Multiple Regions Associated with Head Size in Catfish
Source: Oxford University Press journal article supplement (doi:10.1534/g3.116.032201), 2016-08-25
Supplement: 032201_figures6.pdf [file 032201_figures6.pdf]

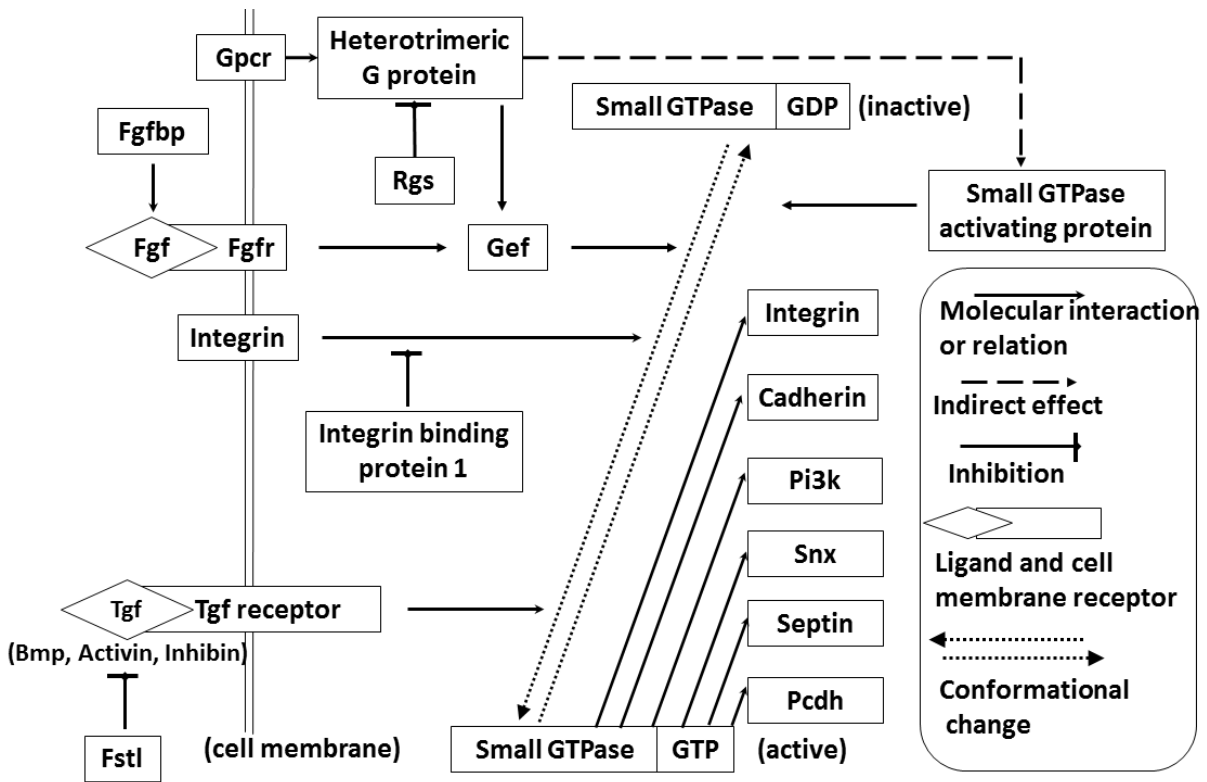

Figure S6. Signal transduction involving small GTPases and the other candidate genes.
