# Supplementary material for: A Genome-Wide Association Study Identifies Multiple Regions Associated with Head Size in Catfish
Source: G3 (Bethesda). 2016 Aug 24;6(10):3389–98. doi: 10.1534/g3.116.032201 (PMC5068958; doi:10.1534/g3.116.032201)
Supplement: Supplemental Material [file supp_g3.116.032201_TableS1.xlsx]

## Sheet: Sheet1
Table S1. The pedigree information of catfish samples used in this study.
Family ID	Dam	Sire	Sample number
1	Channel 1	Hybrid 1	95
2	Channel 2	Hybrid 1	91
3	Channel 3	Hybrid 2	55
4	Channel 4	Hybrid 2	27
5	Channel 5	Hybrid 2	10
6	Channel 6	Hybrid 1	106
7	Channel 7	Hybrid 1	57
8	Channel 8	Hybrid 1	22
9	Channel 9	Hybrid 1	93
